# Supplementary material for: Pherotypes are driving genetic differentiation within Streptococcus pneumoniae
Source: PubMed Central journal article supplement (PMC2751782; doi:10.1186/1471-2180-9-191), 2009-09-07
Supplement: 1471-2180-9-191-S1.pdf [file 1471-2180-9-191-S1.pdf]

**Table S1.** Pherotype distribution among serotypes.

| <b>Serotype</b> | <b>CSP-1</b> | <b>CSP-2</b> | <b>OR (95%CI)</b>                          | <b>FDR<sup>a</sup></b> |
|-----------------|--------------|--------------|--------------------------------------------|------------------------|
| 1 <sup>b</sup>  | 48           | 2            | 11.43 (2.93;98.52)                         | <10 <sup>-4</sup>      |
| 3 <sup>b</sup>  | 23           | 23           | 0.38 (0.19;0.73)                           | 0.017                  |
| 4               | 16           | 13           | 0.49 (0.21;1.14)                           | NS <sup>c</sup>        |
| 5               | 9            | 4            | 0.94 (0.26;4.23)                           | NS <sup>c</sup>        |
| 6A <sup>b</sup> | 2            | 11           | 0.08 (0.007;0.33)                          | <10 <sup>-4</sup>      |
| 6B              | 9            | 5            | 0.74 (0.22;2.88)                           | NS <sup>c</sup>        |
| 7C              | 0            | 1            | 0 (0;16.24)                                | NS <sup>c</sup>        |
| 7F              | 14           | 4            | 1.48 (0.45;6.27)                           | NS <sup>c</sup>        |
| 8               | 20           | 8            | 1.04 (0.43;2.81)                           | NS <sup>c</sup>        |
| 9L              | 0            | 1            | 0 (0; 16.24)                               | NS <sup>c</sup>        |
| 9N <sup>b</sup> | 2            | 8            | 0.10 (0.01;0.51)                           | 0.013                  |
| 9V              | 20           | 2            | 4.35 (1.03;38.92)                          | NS <sup>c</sup>        |
| 10A             | 4            | 5            | 0.33 (0.064;1.54)                          | NS <sup>c</sup>        |
| 10F             | 2            | 1            | 0.83 (0.04;49.42)                          | NS <sup>c</sup>        |
| 11A             | 7            | 0            | Inf <sup>d</sup> (0.60;Inf <sup>d</sup> )  | NS <sup>c</sup>        |
| 11B             | 0            | 1            | 0 (0;16.24)                                | NS <sup>c</sup>        |
| 12B             | 13           | 3            | 1.83 (0.49;10.19)                          | NS <sup>c</sup>        |
| 13              | 2            | 1            | 0.83 (0.04;49.42)                          | NS <sup>c</sup>        |
| 14 <sup>b</sup> | 61           | 4            | 7.50 (2.70;28.99)                          | <10 <sup>-4</sup>      |
| 15B             | 2            | 0            | Inf <sup>d</sup> (0.08;Inf <sup>d</sup> )  | NS <sup>c</sup>        |
| 16F             | 2            | 2            | 0.41 (0.00;5.76)                           | NS <sup>c</sup>        |
| 17F             | 0            | 2            | 0 (0;2.21)                                 | NS <sup>c</sup>        |
| 18A             | 3            | 2            | 0.62 (0.07;7.52)                           | NS <sup>c</sup>        |
| 18C             | 8            | 4            | 0.83 (0.22;3.83)                           | NS <sup>c</sup>        |
| 19A             | 12           | 5            | 1.00 (0.32;3.69)                           | NS <sup>c</sup>        |
| 19F             | 5            | 6            | 0.34 (0.08;1.35)                           | NS <sup>c</sup>        |
| 20              | 3            | 2            | 0.62 (0.07;7.52)                           | NS <sup>c</sup>        |
| 22F             | 12           | 0            | Inf <sup>d</sup> (1.18;Inf <sup>d</sup> )  | NS <sup>c</sup>        |
| 23A             | 1            | 0            | Inf <sup>d</sup> (0.01; Inf <sup>d</sup> ) | NS <sup>c</sup>        |
| 23B             | 2            | 0            | Inf <sup>d</sup> (0.08; Inf <sup>d</sup> ) | NS <sup>c</sup>        |
| 23F             | 18           | 6            | 1.26 (0.47;3.97)                           | NS <sup>c</sup>        |
| 24F             | 0            | 2            | 0 (0;2.21)                                 | NS <sup>c</sup>        |
| 25A             | 0            | 1            | 0 (0;16.24)                                | NS <sup>c</sup>        |
| 25F             | 0            | 1            | 0 (0;16.24)                                | NS <sup>c</sup>        |
| 31              | 0            | 3            | 0 (0; 1)                                   | NS <sup>c</sup>        |
| 33A             | 1            | 0            | Inf <sup>d</sup> (0.01;Inf <sup>d</sup> )  | NS <sup>c</sup>        |
| 33F             | 7            | 0            | Inf <sup>d</sup> (0.60;Inf <sup>d</sup> )  | NS <sup>c</sup>        |
| 35B             | 1            | 0            | Inf <sup>d</sup> (0.01;Inf <sup>d</sup> )  | NS <sup>c</sup>        |
| 35F             | 3            | 0            | Inf <sup>d</sup> (0.17;Inf <sup>d</sup> )  | NS <sup>c</sup>        |
| 36              | 0            | 1            | 0 (0;16.24)                                | NS <sup>c</sup>        |
| 38              | 1            | 1            | 0.42 (0.005;32.78)                         | NS <sup>c</sup>        |
| NT <sup>e</sup> | 8            | 7            | 0.42 (0.14;1.54)                           | NS <sup>c</sup>        |

<sup>a</sup> Correction for multiple testing performed by the false discovery rate method (FDR)

<sup>b</sup> p<0.05 after FDR correction

<sup>c</sup> NS, not significant

<sup>d</sup> Inf, infinite value.

<sup>e</sup> NT, non-typable strains
