# Supplementary material for: Pherotypes are driving genetic differentiation within Streptococcus pneumoniae
Source: PubMed Central journal article supplement (PMC2751782; doi:10.1186/1471-2180-9-191), 2009-09-07
Supplement: 1471-2180-9-191-S2.pdf [file 1471-2180-9-191-S2.pdf]

**Table S2.** Pherotype distribution among PFGE clusters.

| Serotype | no. of isolates | PFGE cluster   | CSP-1 | CSP-2 | OR (95%CI)                                 | FDR <sup>a</sup> |
|----------|-----------------|----------------|-------|-------|--------------------------------------------|------------------|
| 1        | 50              | A <sup>b</sup> | 32    | 1     | 14.56 (2.38;597.17)                        | 0.012            |
|          |                 | B              | 16    | 1     | 6.93 (1.06;292.78)                         | 0.317            |
| 3        | 46              | A <sup>b</sup> | 20    | 22    | 0.34 (0.17;0.68)                           | 0.029            |
|          |                 | B              | 3     | 0     | Inf <sup>c</sup> (0.17; Inf <sup>c</sup> ) | 0.948            |
|          |                 | C              | 0     | 1     | 0 (0;16.24)                                | 0.593            |
| 4        | 29              | A              | 2     | 0     | Inf <sup>c</sup> (0.08; Inf <sup>c</sup> ) | 1                |
|          |                 | B              | 0     | 3     | 0 (0;1)                                    | 0.293            |
|          |                 | C <sup>b</sup> | 2     | 9     | 0.09 (0.01;0.43)                           | 0.016            |
|          |                 | D              | 12    | 1     | 5.13 (0.75;221.18)                         | 0.589            |
| 6A       | 13              | A              | 0     | 1     | 0 (0;16.24)                                | 0.593            |
|          |                 | B              | 0     | 1     | 0 (0;16.24)                                | 0.593            |
|          |                 | C              | 0     | 3     | 0 (0;1)                                    | 0.293            |
|          |                 | D              | 0     | 1     | 0 (0;16.24)                                | 0.593            |
|          |                 | E              | 1     | 1     | 0.42 (0.005;32.78)                         | 0.877            |
|          |                 | F              | 0     | 2     | 0 (0;2.21)                                 | 0.457            |
|          |                 | G              | 0     | 1     | 0(0;16.24)                                 | 0.593            |
|          |                 | H              | 1     |       | Inf <sup>c</sup> (0.01; Inf <sup>c</sup> ) | 1                |
|          |                 | I              | 0     | 1     | 0 (0;16.24)                                | 0.593            |
| 9N       | 10              | A <sup>b</sup> | 2     | 8     | 0.10 (0.01;0.51)                           | 0.029            |
| 14       | 65              | A              | 2     | 0     | Inf <sup>c</sup> (0.08; Inf <sup>c</sup> ) | 1                |
|          |                 | B              | 10    | 0     | Inf <sup>c</sup> (0.94; Inf <sup>c</sup> ) | 0.373            |
|          |                 | C              | 2     | 0     | Inf <sup>c</sup> (0.08; Inf <sup>c</sup> ) | 1                |
|          |                 | D <sup>b</sup> | 46    | 3     | 7.21 (2.25;36.84)                          | 0.006            |
|          |                 | E              | 1     | 1     | 0.42 (0.005;32.78)                         | 0.877            |

<sup>a</sup> Correction for multiple testing performed by the false discovery rate method (FDR)

<sup>b</sup> p<0.05 after FDR correction.

<sup>c</sup> Inf, infinite value.
